# Supplementary material
Source: PubMed Central journal article supplement (PMC3183856)
Supplement: hdy201070x7.pdf [file hdy201070x7.pdf]

Table S2- Pairwise genetic distance matrices for the A genome of *S. alburnoides* complex populations based on  $F_{ST}$  (below diagonal) and  $G'_{ST}$  (above diagonal) estimators. Do, Douro River basin; Mo, Mondego River basin; Tg, Tagus River basin; Gd, Guadiana River basin.

|             | Do-Tâmega | Do-Rabaçal | Do-Paiva | Do-Manzanas | Do-Lodeiro | Mo-Ceira | Mo-Alva | Tg-Almonte | Gu-Zujar |
|-------------|-----------|------------|----------|-------------|------------|----------|---------|------------|----------|
| Do-Tâmega   |           | 0,211      | 0,432    | 0,116       | 0,490      | 0,906    | 0,898   | 0,798      | 0,778    |
| Do-Rabaçal  | 0,120     |            | 0,591    | 0,279       | 0,622      | 0,832    | 0,819   | 0,740      | 0,699    |
| Do-Paiva    | 0,302     | 0,359      |          | 0,658       | 0,000      | 1,000    | 1,000   | 0,972      | 0,944    |
| Do-Manzanas | 0,089     | 0,184      | 0,548    |             | 0,694      | 0,877    | 0,860   | 0,768      | 0,736    |
| Do-Lodeiro  | 0,416     | 0,475      | 0,000    | 0,657       |            | 0,988    | 0,968   | 0,917      | 0,889    |
| Mo-Ceira    | 0,679     | 0,556      | 0,843    | 0,747       | 0,881      |          | 0,296   | 0,842      | 0,796    |
| Mo-Alva     | 0,630     | 0,512      | 0,771    | 0,689       | 0,832      | 0,230    |         | 0,774      | 0,748    |
| Tg-Almonte  | 0,436     | 0,352      | 0,571    | 0,493       | 0,704      | 0,555    | 0,473   |            | 0,513    |
| Gu-Zujar    | 0,384     | 0,297      | 0,504    | 0,432       | 0,651      | 0,490    | 0,422   | 0,199      |          |
