# Supplementary material
Source: PubMed Central journal article supplement (PMC3183856)

### LCO4

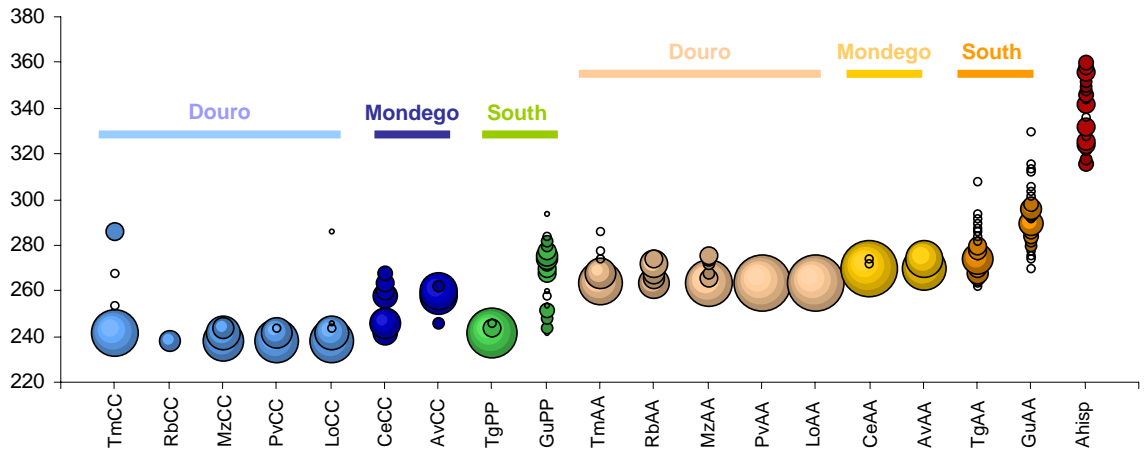

### N7J4

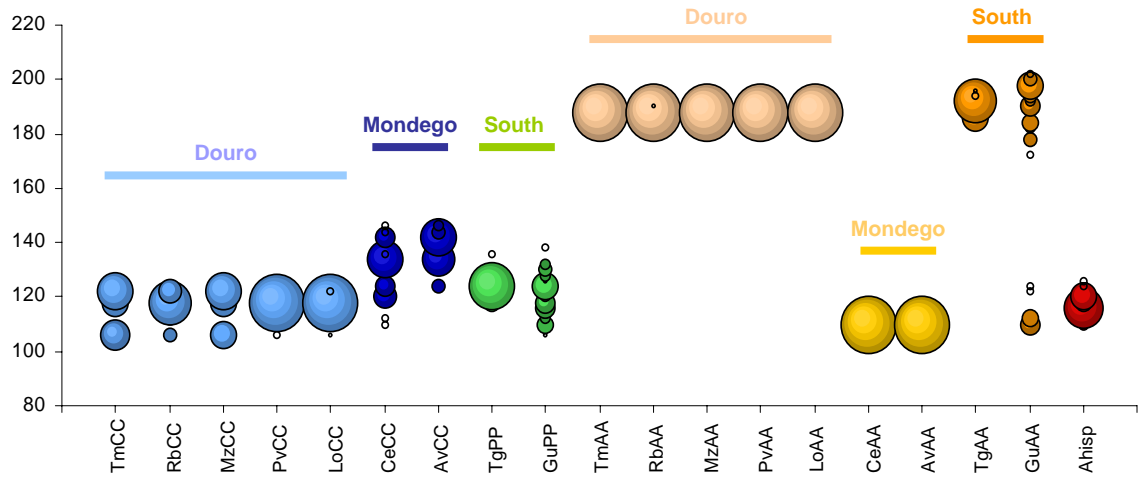

### N7K4

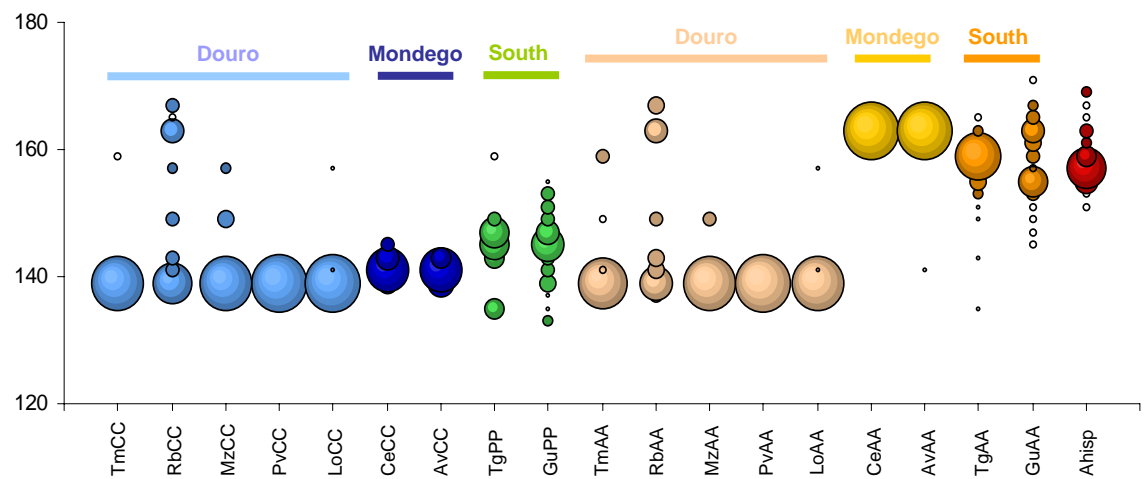

### LCO3

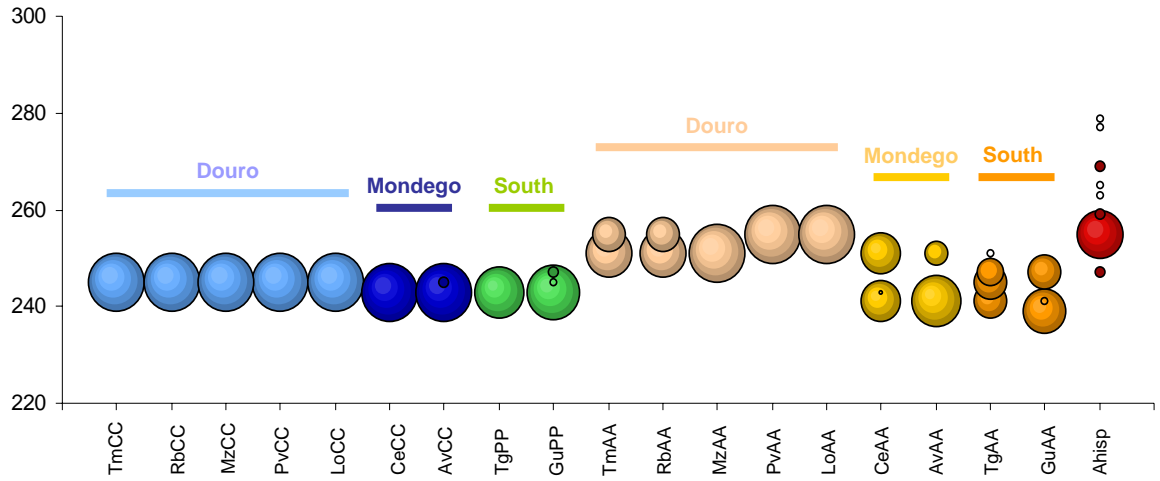

### LCO5

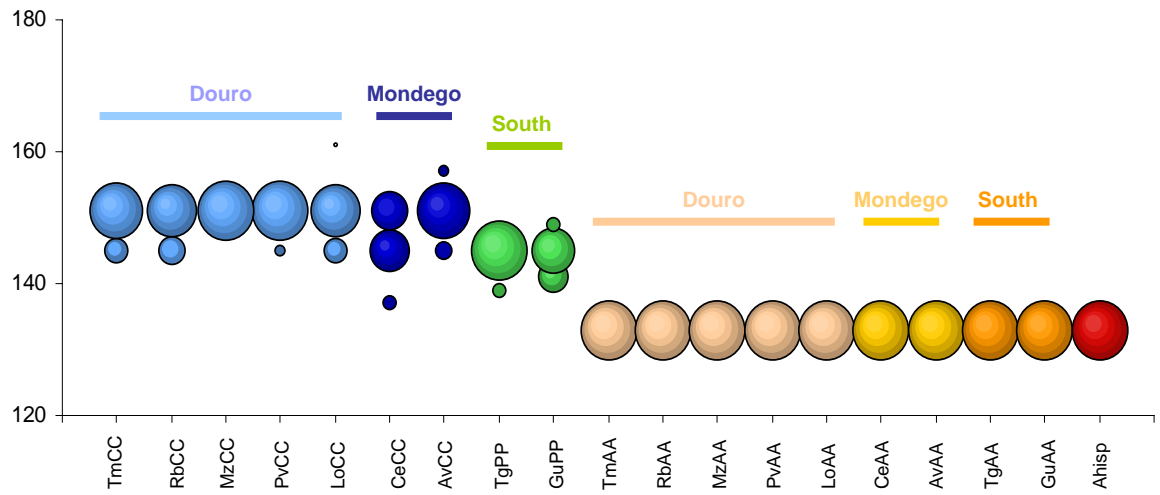

### E1G6

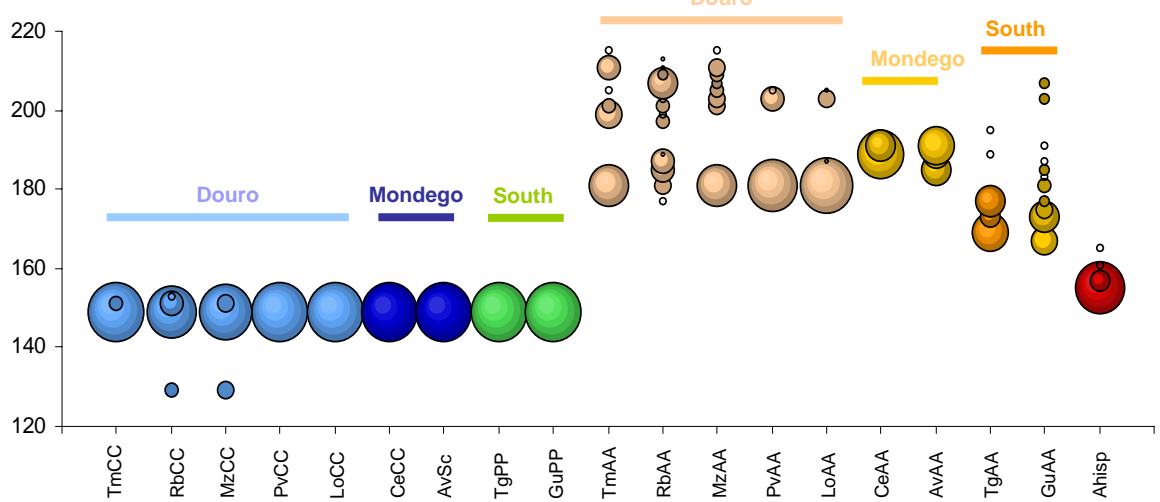

Supplement: hdy201070x1.pdf [file hdy201070x1.pdf]

a)

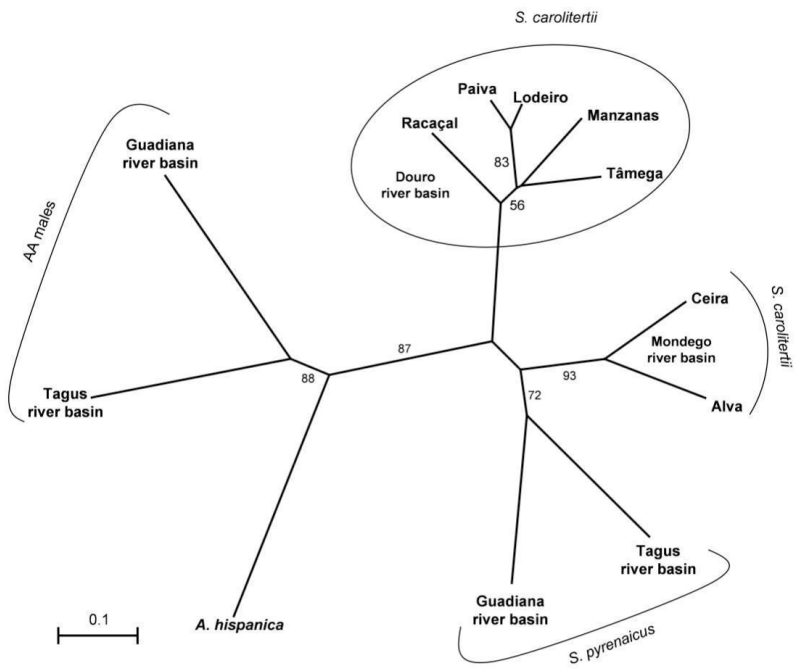

b)

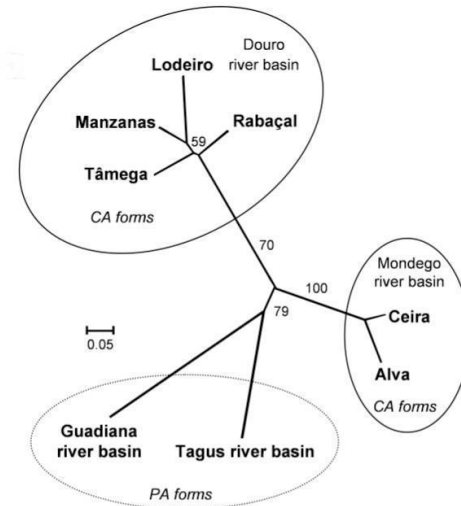

c)

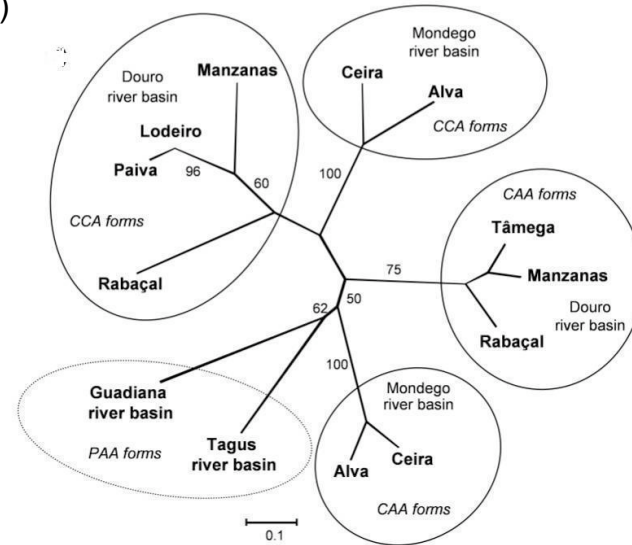

Supplement: hdy201070x2.pdf [file hdy201070x2.pdf]

a)

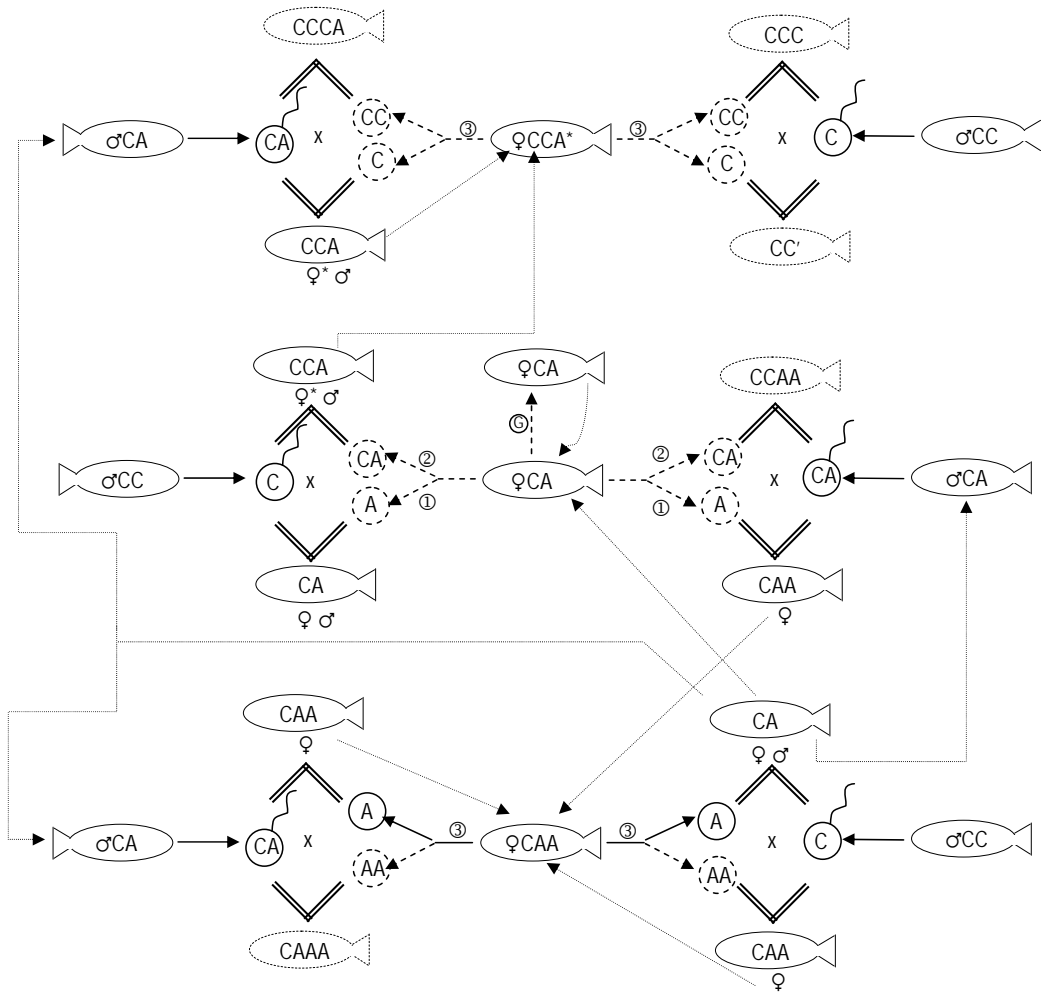

b)

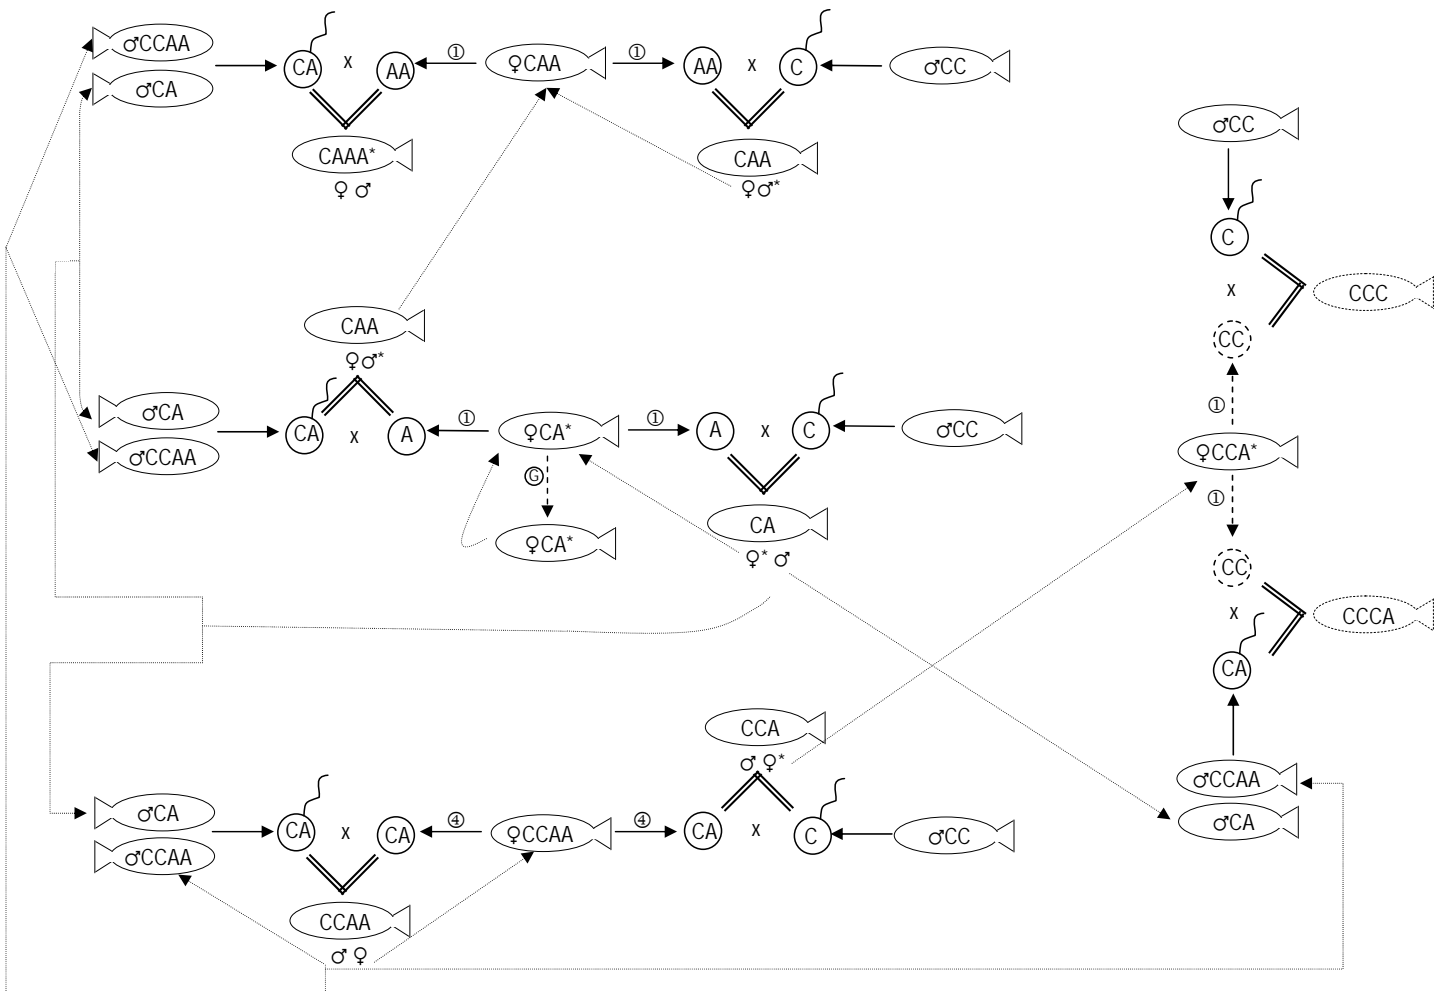

Supplement: hdy201070x3.pdf [file hdy201070x3.pdf]

(a)

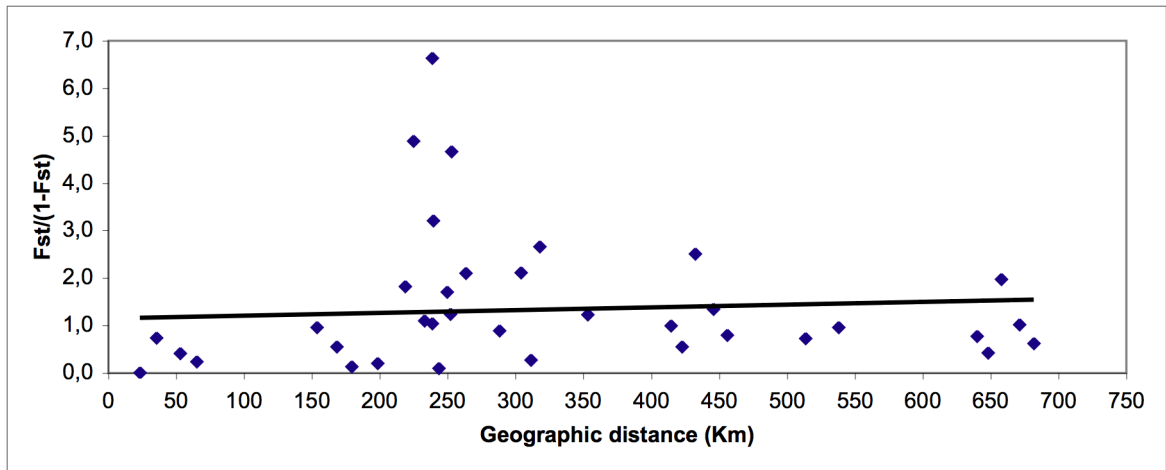

(b)

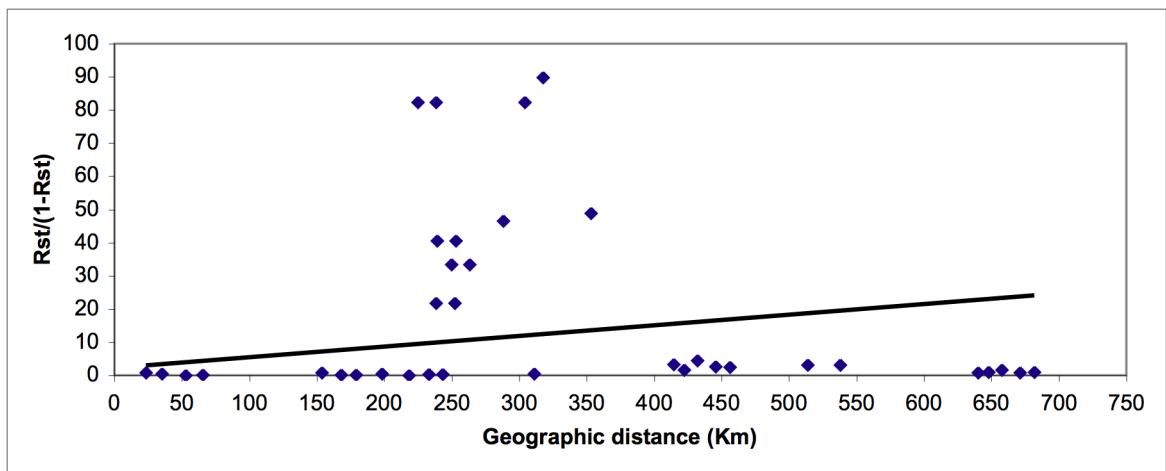

Supplement: hdy201070x4.pdf [file hdy201070x4.pdf]
